# Supplementary material for: CCL20 promotes lung adenocarcinoma progression by driving epithelial-mesenchymal transition
Source: PubMed Central journal article supplement (PMC9295072; doi:10.7150/ijbs.73275), 2022-06-27
Supplement: ijbsv18p4275s1.pdf [file ijbsv18p4275s1.pdf]

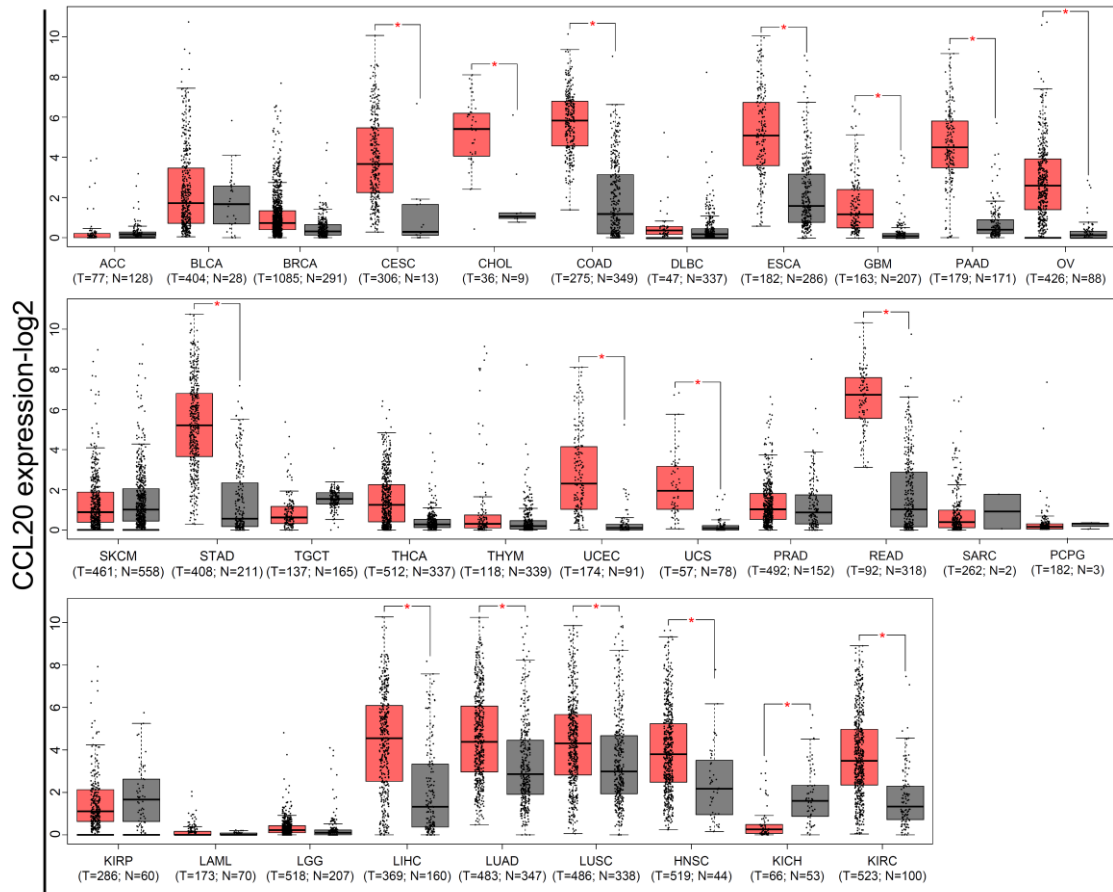

**Figure S1.** Landscape of CCL20 expression in pan-cancer.

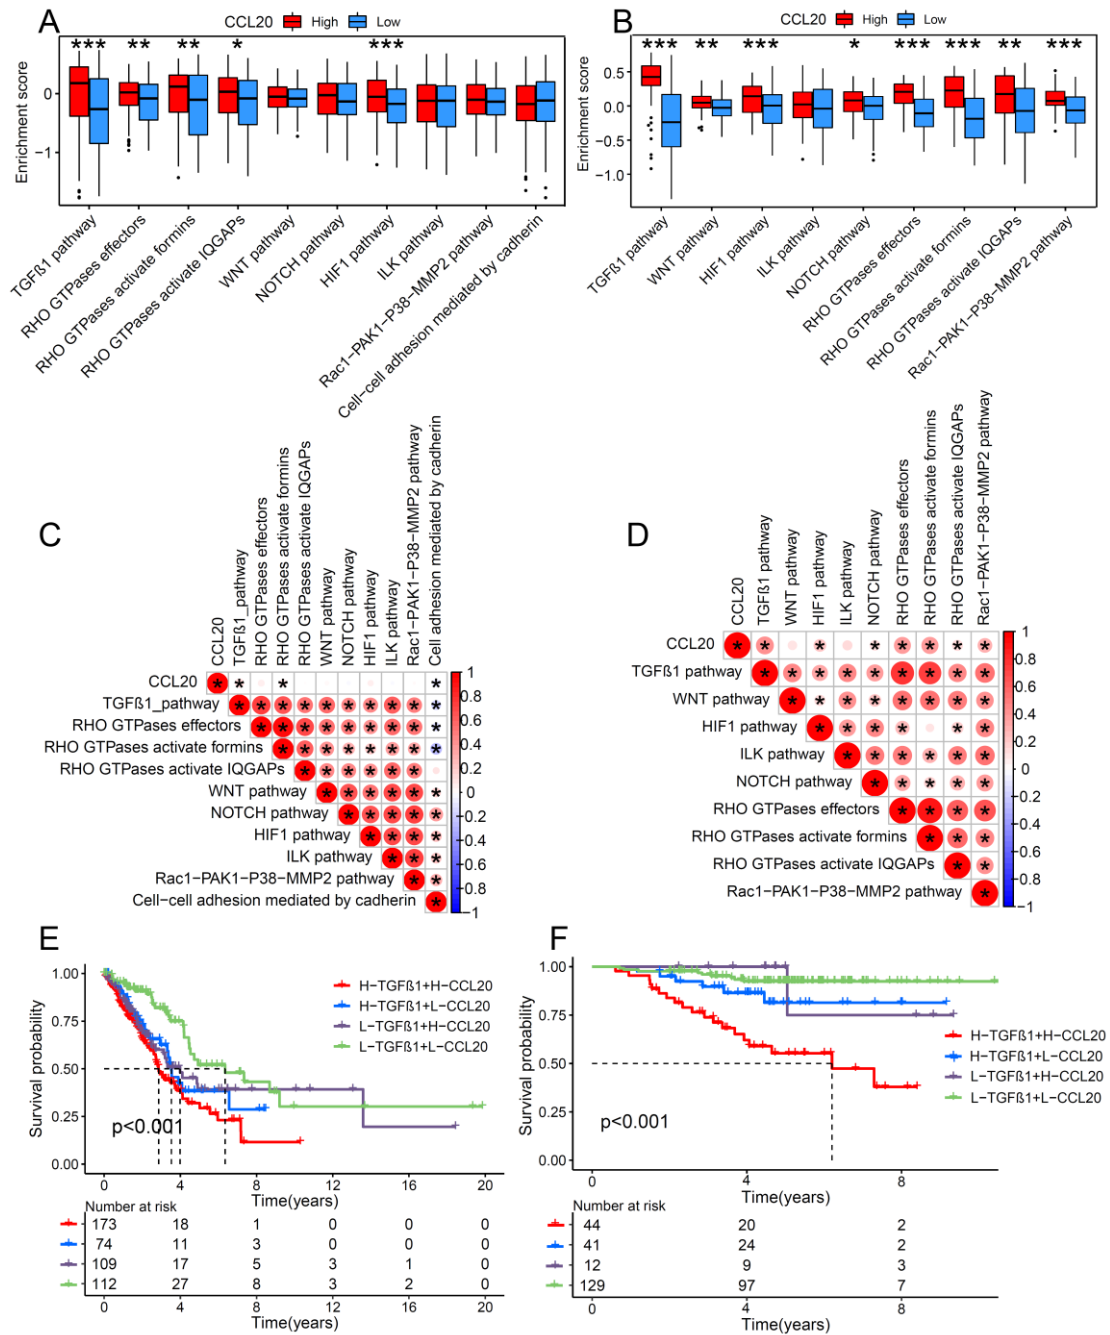

**Figure S2.** The relationship between CCL20 and EMT-related pathways. Differences in EMT-related pathways between high CCL20 and low CCL20 groups in TCGA cohort (A) and GSE31210 cohort (B). Correlation analysis of CCL20 and EMT-related pathways in TCGA cohort (C) and GSE31210 cohort (D). OS analysis for subgroup patients stratified by both CCL20 and TGF- $\beta$  in TCGA cohort (E) and GSE31210 cohort (F)

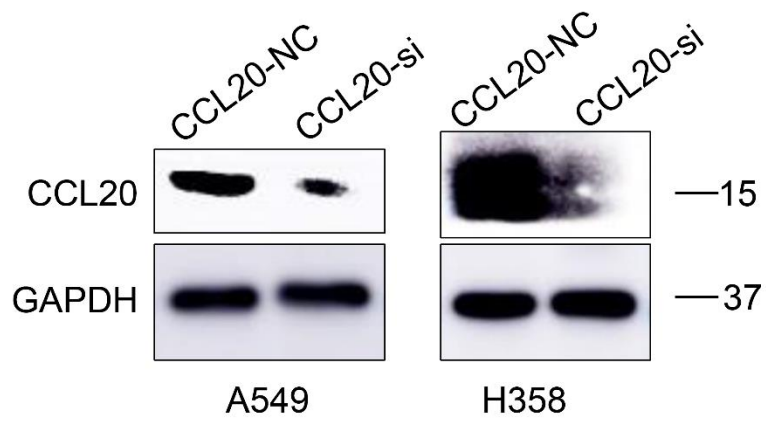

**Figure S3.** The knockdown efficiency of CCL20 in A549 and H358 cell lines was examined by western blot. GAPDH was served as control.
